# Supplementary material
Source: Elsevier journal article supplement (https://www.sciencedirect.com/science/article/pii/S0211563818301081)
Supplement: mmc1 [file S0211563818301081:mmc1.docx]

**STROBE Lista de Chequeo**

Lista de verificación de los elementos que deben ser incluidos en los informes de los estudios observacionales

| **Sección** | | Item No | | Recomendación | Reported on Page No | |
| --- | --- | --- | --- | --- | --- | --- |
| **Título y Resumen** | | 1 | | (*a*) Identifique el artículo como un estudio de cohortes en el título o el resumen | 1 | |
| (*b*) El resumen debería ser una síntesis estructurada y muy informativa del artículo, teniendo en cuenta los puntos desarrollados en la lista de comprobación que sigue | 2 | |
| Introduction | | | | | | |
| Antecedentes/ fundamentos | | 2 | | Explique los antecedentes científicos y los fundamentos del estudio | 4-5 | |
| Objetivos | | 3 | | Consigne los objetivos específicos y cualquier hipótesis pre-especificada | 5 | |
| Métodos | | | | | | |
| Diseño del estudio | | 4 | | Presente los elementos clave del diseño del estudio. Declare el objetivo general del estudio original, si el artículo es uno de varios de un estudio en curso | 5 | |
| Marco | | 5 | | Describa el marco, lugares y fechas, definiendo los periodos de recogida de datos | 5-6 | |
| Participantes | | 6 | | (*a*) *Explique los criterios de inclusión y exclusión, la fuente y los métodos de selección de los participantes*  *Para los casos y los controles por separado, explique los criterios de inclusión y exclusión, la fuente y los métodos de selección*  *Explique los criterios de inclusión y exclusión, la fuente y los métodos de selección de los participantes* | 6 | |
| (*b*)*Describa los periodos y los métodos de seguimiento*  *Dé criterios diagnósticos precisos de los casos y motivos para escoger a los controles* | 5 | |
| Variables de interés | | 7 | | Proporcione una lista y defina claramente todas las variables de interés, indicando cuáles son tratadas como medidas de efecto o de exposición y cuáles son potenciales predictoras, variables de confusión o modificadoras | 7-6 | |
| Medidas  Sesgos | | 8* | | Proporcione detalles de los métodos de determinación para cada variable de interés  Si procede, describa la comparabilidad de los procedimientos en los diferentes grupos | 7-6 | |
| Tamaño de la muestra | | 9 | | Describa cualquier tipo de medida utilizada para afrontar las potenciales fuentes de sesgo | 8 | |
| Métodos estadísticos | | 10 | | Explique cómo se llegó al tamaño de la muestra | 6 | |
| Variables cuantitativas | | 11 | | Explique cómo se analizaron las variables cuantitativas; por ejemplo, qué categorizaciones o agrupaciones se escogieron y por qué? | 8 | |
| Métodos estadísticos | | 12 | | (*a*) Describa todos los métodos estadísticos, incluyendo aquellos para el control de la confusión | 8-9 | |
| (*b*) Describa cualquier método usado para examinar subgrupos e interacciones | 8-9 | |
| (*c*) Explique cómo dichos valores se abordaron | 8-9 | |
| (*d*) *Estudio de cohort* —Si procede, explique cómo se trataron las pérdidas en el seguimiento y los datos faltantes o perdidos  *Caso. Control de estudio*—Si procede, explique cómo se trataron el emparejamiento y los datos faltantes o perdidos  *Estudio transversal*—Si procede, describa los métodos de análisis, teniendo en cuenta la estrategia d muestreo | 8-9 | |
| (*e*) Describa cualquier análisis de sensibilidad | NA | |
| **Sección** | | Item No | | Recomendación | | | Reportado en la página No. | |
| Resultados | | | | | | | | |
| Participantes | | 13* | | (a) Para cada fase de estudio, informe del número de individuos, potencialmente elegibles, examinados para ser elegidos (si se conoce) incluidos en el estudio, que han acabado el seguimiento y analizados | | | 9 | |
| (b) Explique las razones de no participación de cada etapa del proceso | | | 9 | |
| (c) Se recomienda la inclusión de un diagrama de flujo | | | NA | |
| Datos descriptivos | | 14* | | (a) Describa las características de los participantes en el estudio (ej; datos demográficos, clínicos o sociales e información sobre las exposiciones y los potenciales confusores) | | | 10 | |
| (b) Indique, para cada variable de interés del estudio, la exhaustividad de los datos | | | 10 | |
| (c) *Estudio de cohorte*—proporcione la media, la duración total y las fechas del seguimiento | | |  | |
| Datos de resultados | | 15* | | *Estudio de cohorte*—Proporcione el número de sucesos del evento o tasas temporales | | | NA | |
| *Caso control de estudio—*Informe el número de casos y controles de cada categoría de exposición | | | NA | |
| *Estudio transversal—*Informe el número de sucesos del evento o de medidas resumen para cada grupo en comparación | | | 10 | |
| Principales resultados | | 16 | | (*a*) Proporcione medidas de asociación directa (crudas) o sin ajustar, así como ajustadas por las variables de confusión y su precisión (ej; intervalos de confianza del 95%). Deje claro por qué variables de confusión se ajustó y la justificación para incluir esas variables de ajuste y otras no | | | 10 | |
| (*b*) Para comparaciones que usen categorías derivadas de variables cuantitativas, indique el rango de valores o el valor mediano para cada grupo | | | 10 | |
| (*c*) Transforme las medidas relativas en diferencias absolutas de riesgo para periodos de tiempo significativos que no se extiendan más allá del rango de los datos | | | 10 | |
| Otros análisis | | 17 | | Informe de otros análisis realizados, por ejemplo, análisis de subgrupos y análisis de sensibilidad | | | NA | |
| Discusión | | | | | | | | |
| Hallazgos clave | | 18 | | Resuma los hallazgos más importantes en relación con las hipótesis del estudio | | | 10-11 | |
| Limitaciones | | 19 | | Discuta las limitaciones de estudio, teniendo en cuenta las fuentes potenciales de sesgo o de falta de precisión, y los problemas que pudieran derivarse por la multiplicidad de análisis, exposiciones y resultados estudiados. Discuta tanto al dirección como la magnitud de los potenciales sesgos | | | 11 | |
| Interpretación | | 20 | | Dar una interpretación cautelosa general de los resultados teniendo en cuenta los objetivos, limitaciones, multiplicidad de análisis, los resultados de estudios similares y otras pruebas pertinentes | | | 11-13 | |
| Generalización | | 21 | | Discutir la generalización (validez externa) de los resultados del estudio | | | 12 | |
| Otra información | | | | | | | | |
| Financiamiento | | 22 | | Dar la fuente de financiación y el papel de los patrocinadores para el presente estudio y, en su caso, para el estudio original en el que se basa el presente artículo | | | NA | |

*** *Dar información por separado para casos y controles en los estudios de casos y controles y, en su caso, para los grupos expuestos y no expuestos en cohortes y estudios transversales.*
